# Supplementary material for: A simple and programmable dual-mode aptasensor for the ultrasensitive detection of multidrug-resistant bacteria
Source: Royal Society of Chemistry journal article supplement (doi:10.1039/d2bm01771g), 2022-12-30
Supplement: d2bm01771g1.pdf [file d2bm01771g1.pdf]

## Supporting Information

### **A Simple and Programmable Dual-mode Aptasensor for Ultrasensitive Detection of Multidrug-resistant bacteria**

*Fengfeng Zhao<sup>1\*</sup>, Mingyuan Zou<sup>1</sup>, Huina Wu<sup>1</sup>, Yuming Yao<sup>1</sup>, Meiling Zhou<sup>1</sup>, Shuo Ma<sup>1</sup>, Feng Xiao<sup>1</sup>, GuliNazhaer Abudushalamu<sup>1</sup>, Yaya Chen<sup>1</sup>, Shijie Cai<sup>1</sup>, Chenyan Yuan<sup>1</sup>, Xiaobo Fan<sup>2</sup>, Xinglu Jiang<sup>3\*</sup>, Guoqiu Wu<sup>1,2,4\*</sup>*

*1. Center of Clinical Laboratory Medicine, Zhongda Hospital, School of Medicine, Southeast University, Nanjing 210009, People's Republic of China*

*2. Diagnostics Department, Medical School of Southeast University, Nanjing 210009, People's Republic of China*

*3. Clinical Laboratory Medicine Department, College of Stomatology, Hospital of Stomatology, Guangxi Medical University, Nanning 530021, People's Republic of China*

*4. Jiangsu Provincial Key Laboratory of Critical Care Medicine, Southeast University, Nanjing 210009, People's Republic of China*

Table S1. The sequences of the aptamers used in this work.

| Name                                            | Sequence (5'→3')                                                                                                                                                              |
|-------------------------------------------------|-------------------------------------------------------------------------------------------------------------------------------------------------------------------------------|
| MRSA aptamer 1 <sup>[1]</sup>                   | NH <sub>2</sub> -CCATCCACACTCCGCAAGGGTGCCCCGGGGGGCTGTTTCAGCGTGGT<br>GGTGGGATGCCGTTTTTGGTCCTTAGTCTCCGTCGTCGGCTGCCTCTACAT<br>SH-CCATCCACACTCCGCAAGGGTGCCCCGGGGGGCTGTTTCAGCGTGGT |
| MRSA aptamer 2                                  | GGTGGGATGCCGTTTTTGGTCCTTAGTCTCCGTCGTCGGCTGCCTCTACAT-<br>BHQ2                                                                                                                  |
| MRSA probe                                      | TTTTTTATGTAGAGGCAG-Cy5                                                                                                                                                        |
| <i>E. coli</i> aptamer 1 <sup>[2]</sup>         | NH <sub>2</sub> -GGCAGGACACCGTAACGGGTATGCAGCTATCCCGGGCGCTGTCTGA<br>AGATCGTGTGCTGCT<br>SH-                                                                                     |
| <i>E. coli</i> aptamer 2                        | GGCAGGACACCGTAACGGGTATGCAGCTATCCCGGGCGCTGTCTGAA<br>GATCGTGTGCTGCT-BHQ2                                                                                                        |
| <i>E. coli</i> probe                            | TTTTTTAGCAGCACACGA-Cy5                                                                                                                                                        |
| <i>M. tuberculosis</i> aptamer 1 <sup>[3]</sup> | NH <sub>2</sub> -GGTGTGTTGACTGAGGGGGTGGGGTGGGTGGTGGTGGATATAGC<br>SH-GGTGTGTTGACTGAGGGGGTGGGGTGGGTGGTGGTGGATATAGC-<br>BHQ2                                                     |
| <i>M. tuberculosis</i> probe                    | TTTTTTGCTATATCCACC-Cy5                                                                                                                                                        |
| <i>A.baumannii</i> aptamer 1 <sup>[4]</sup>     | NH <sub>2</sub> -TACATGGTCAACCAAATCTTGCAAATCTGCATTCCCTACTGT<br>SH-TACATGGTCAACCAAATCTTGCAAATCTGCATTCCCTACTGT-BHQ2                                                             |
| <i>A.baumannii</i> aptamer 2                    | SH-TACATGGTCAACCAAATCTTGCAAATCTGCATTCCCTACTGT-BHQ2                                                                                                                            |
| <i>A.baumannii</i> probe                        | TTTTTTACAGTAGGAATG-Cy5                                                                                                                                                        |
| <i>P. aeruginosa</i> aptamer 1 <sup>[5]</sup>   | NH <sub>2</sub> -GCGCGCGAGATTAACCCCCAATGCTGCACCGAGCCACGA<br>SH-GCGCGCGAGATTAACCCCCAATGCTGCACCGAGCCACGA-BHQ2                                                                   |
| <i>P. aeruginosa</i> aptamer 2                  | SH-GCGCGCGAGATTAACCCCCAATGCTGCACCGAGCCACGA-BHQ2                                                                                                                               |
| <i>P. aeruginosa</i> probe                      | TTTTTTTCGTGGCTCGGT-Cy5                                                                                                                                                        |

The highlighted fragment by the yellow background is the binding region of the probe to the aptamer.

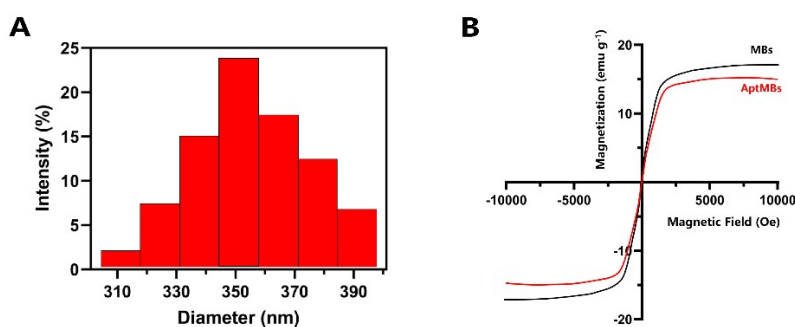

Fig. S1. (A) Size distribution histograms of MBs and (B) Magnetic hysteresis loop of MBs and AptMBs.

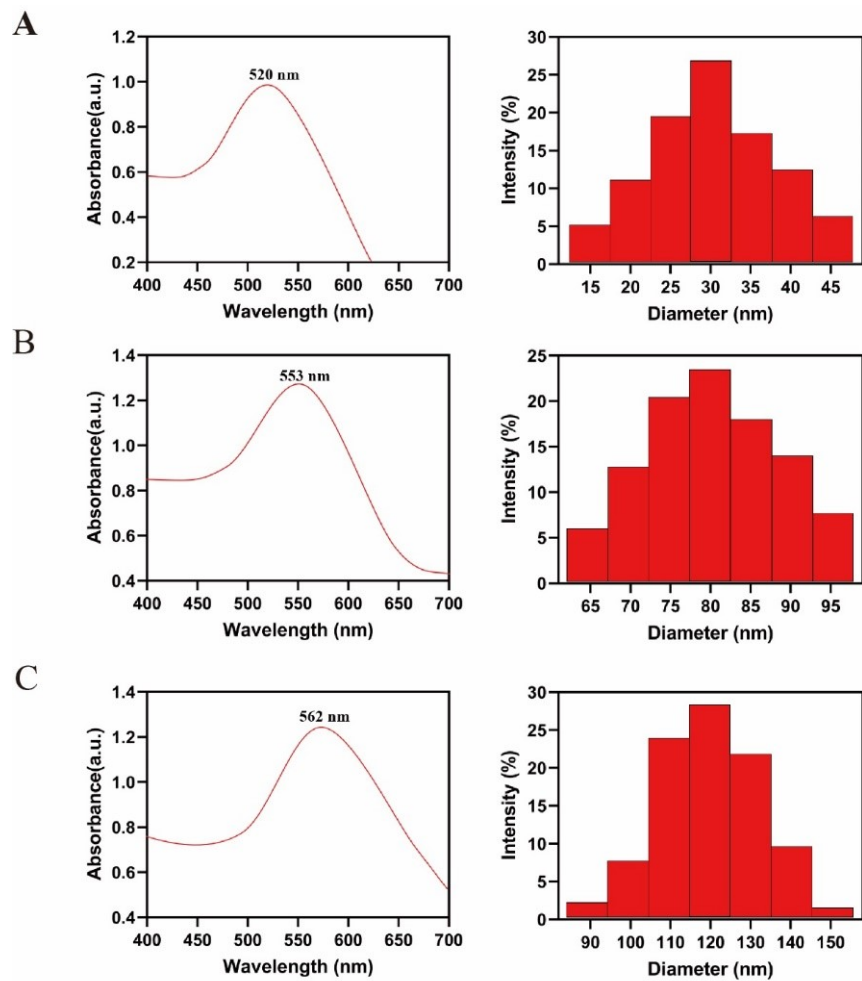

Fig. S2. Characterization of the synthesized GNPs with sizes of 30, 80, and 120 nm through UV-vis absorption spectra.

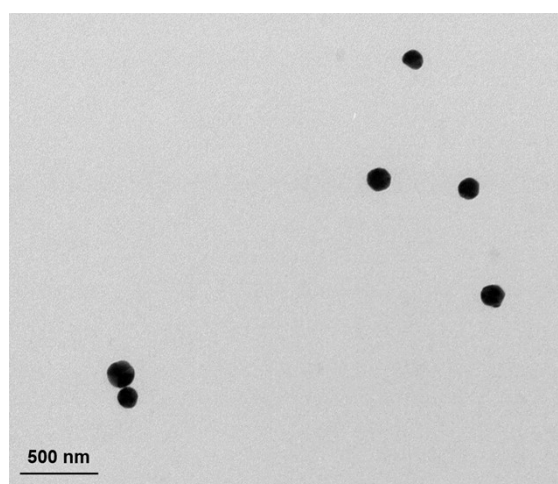

Fig S3. TEM image of AptGNPs (scale bar: 500 nm)

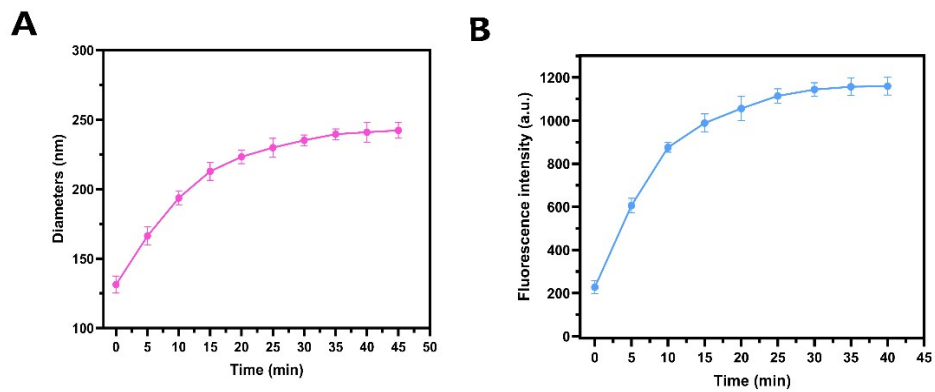

Fig. S4. Recognition time of AptGNPs on dual-mode: (A) Mode-DLS and (B) Mode-Flu.

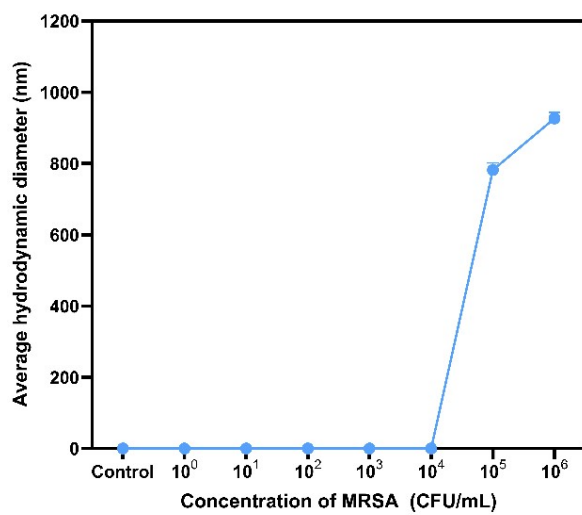

Fig. S5. The average  $D_H$  of MRSA.

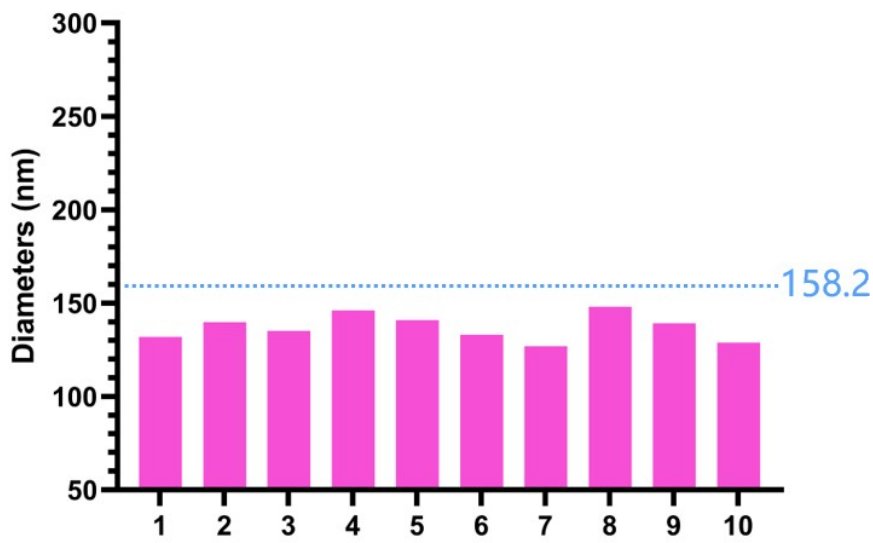

Fig. S6. The hydrodynamic diameter among 10 independent replications in the absence of MRSA. The threshold value of fluorescence intensity was defined as the mean value of negative samples plus 3 standard derivations.

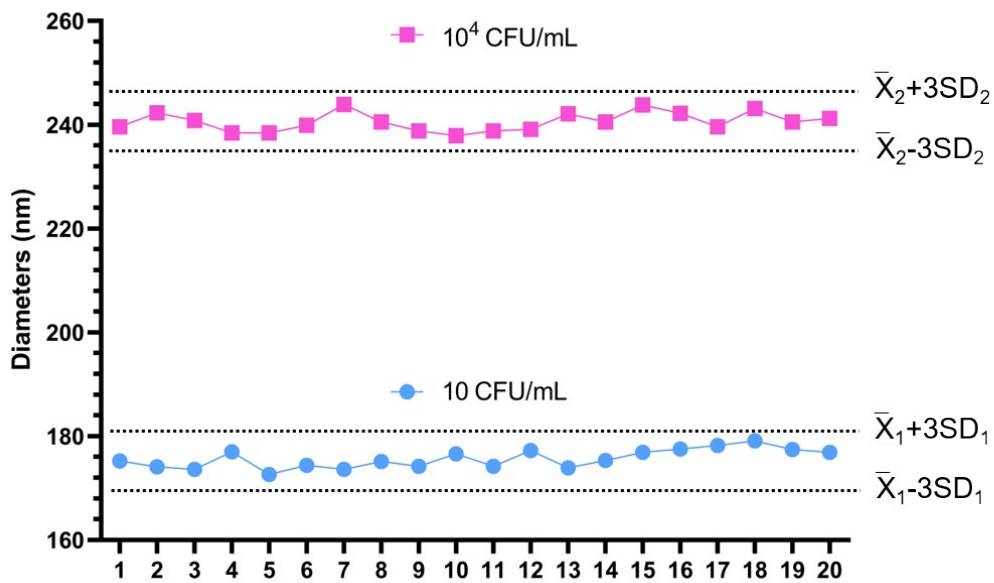

Fig. S7. Levey-Jennings chart-based control for 10 CFU/mL and 10<sup>4</sup> CFU/mL of MRSA concentrations detected by Mode-DLS.  $\bar{X}_1$  and  $\bar{X}_2$  represent the mean  $D_H$  of 10 CFU/mL and 10<sup>4</sup> CFU/mL, and their corresponding standard deviation is  $SD_1$  and  $SD_2$ , respectively.

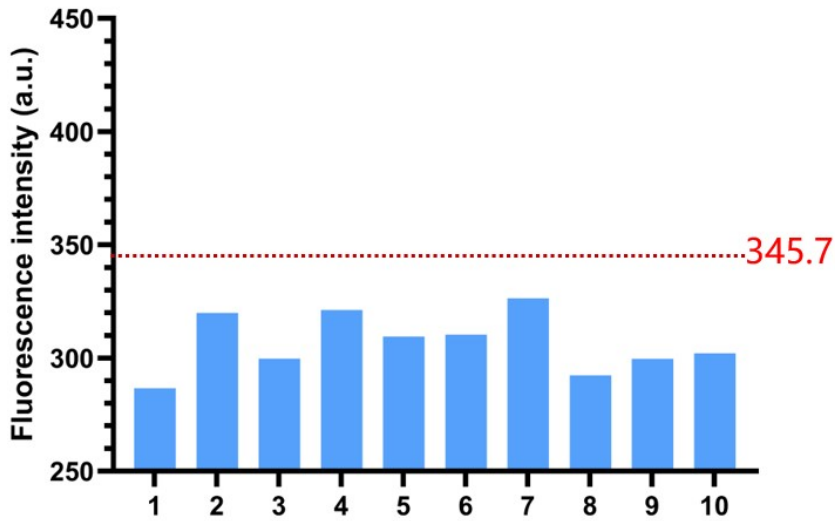

Fig. S8. The peak fluorescence intensity among 10 independent replications in the absence of MRSA. The threshold value of fluorescence intensity was defined as the mean value of negative samples plus 3 standard derivations.

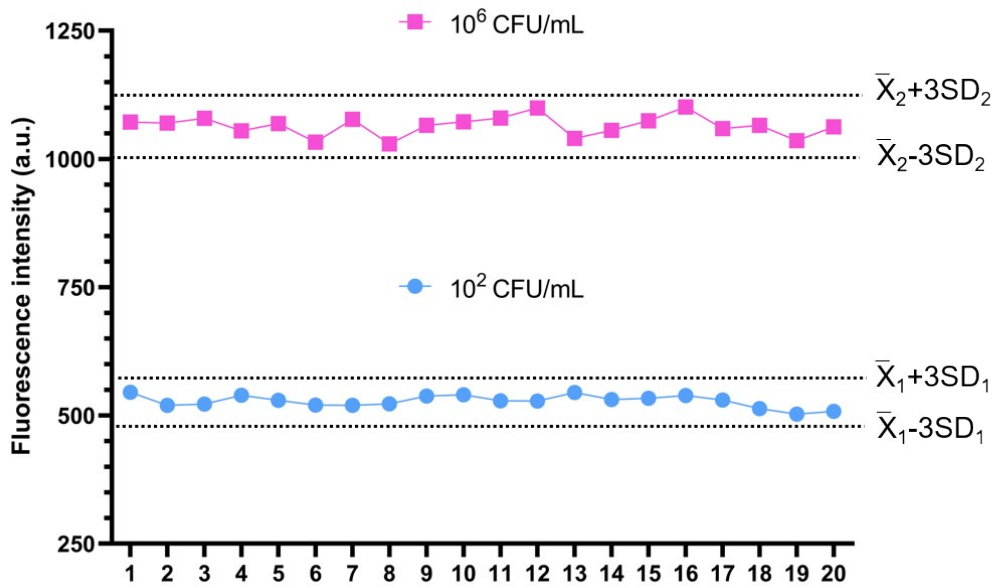

Fig. S9. Levey-Jennings chart-based control for 10<sup>2</sup> CFU/mL and 10<sup>6</sup> CFU/mL of MRSA concentrations detected by Mode-Flu.  $\bar{X}_1$  and  $\bar{X}_2$  represent the mean fluorescence intensity of 10<sup>2</sup> CFU/mL and 10<sup>6</sup> CFU/mL, and their corresponding standard deviation is SD<sub>1</sub> and SD<sub>2</sub>, respectively.

Table S2. Summary of the proposed methods for MDR bacteria detection.

| Method                                  | Target                                | Platform | LOD<br>(CFU/mL) | Detection<br>time (min) | Ref.      |
|-----------------------------------------|---------------------------------------|----------|-----------------|-------------------------|-----------|
| EXPAR                                   | MDR bacteria                          | Yes      | 6.73            | 70                      | [6]       |
| RPA and Cas12a                          | Drug-resistant<br><i>Salmonella</i>   | No       | 1               | 40                      | [7]       |
| Multiplex PCR and CRISPR-<br>Cas system | Drug-resistant<br><i>A. Baumannii</i> | No       | 50              | 120                     | [8]       |
| Fluorescent microspheres                | MRSA                                  | No       | 110             | 10                      | [9]       |
| Modified RPA                            | Drug-resistant<br><i>E. coli</i>      | No       | 319             | 60                      | [10]      |
| Blue polymeric nanobeads                | MRSA                                  | No       | 2               | 5                       | [11]      |
| /                                       | MRSA                                  | No       | 845             | 270                     | [12]      |
| DAPT                                    | MDR bacteria                          | Yes      | 4.63            | 60                      | This work |

## References

- [1] Qiao J, Meng X, Sun Y, et al. Aptamer-based fluorometric assay for direct identification of methicillin-resistant *Staphylococcus aureus* from clinical samples. *J Microbiol Methods*. 2018;153:92-98.
- [2] Chen J, Li H, Xie H, Xu D. A novel method combining aptamer-Ag10NPs based microfluidic biochip with bright field imaging for detection of KPC-2-expressing bacteria. *Anal Chim Acta*. 2020;1132:20-27.
- [3] Dhiman A, Kumar C, Mishra SK, et al. Theranostic Application of a Novel G-Quadruplex-Forming DNA Aptamer Targeting Malate Synthase of *Mycobacterium tuberculosis*. *Mol Ther Nucleic Acids*. 2019;18:661-672.
- [4] Yang S, Guo Y, Fan J, et al. A fluorometric assay for rapid enrichment and determination of bacteria by using zirconium-metal organic frameworks as both capture surface and signal amplification tag. *Mikrochim Acta*. 2020;187(3):188.
- [5] Kubiczek D, Raber H, Bodenberger N, et al. The Diversity of a Polyclonal FluCell-SELEX Library Outperforms Individual Aptamers as Emerging Diagnostic Tools for the Identification of Carbapenem Resistant *Pseudomonas aeruginosa*. *Chemistry*. 2020;26(64):14536-14545.
- [6] Hu X, Qin W, Yuan R, et al. Programmable molecular circuit discriminates multidrug-resistant bacteria. *Mater Today Bio*. 2022;16:100379.
- [7] Fu X, Sun J, Ye Y, Zhang Y, Sun X. A rapid and ultrasensitive dual detection platform based on Cas12a for simultaneous detection of virulence and resistance genes of drug-resistant *Salmonella*. *Biosens Bioelectron*. 2022;195:113682.
- [8] Y.F. Wang, Y.C. Guo, L. Zhang, Y.J. Yang, S.S. Yang, L. Yang, H.J. Chen, C.G. Liu, J.J. Li, G.M. Xie, Integration of multiplex PCR and CRISPR-Cas allows highly specific detection of multidrug-resistant *Acinetobacter Baumannii*, *Sensor. Actuat. B-Chem.*, 334 (2021), p. 129600.
- [9] Yang H, Wang Y, Liu S, et al. Lateral flow assay of methicillin-resistant *Staphylococcus aureus* using bacteriophage cellular wall-binding domain as recognition agent. *Biosens*

Bioelectron. 2021;182:113189.

[10] Raji MA, Suaifan G, Shibl A, et al. Aptasensor for the detection of Methicillin resistant Staphylococcus aureus on contaminated surfaces. Biosens Bioelectron. 2021;176:112910.

[11] Butterworth A, Pratibha P, Marx A, Corrigan DK. Electrochemical Detection of Oxacillin Resistance using Direct-Labeling Solid-Phase Isothermal Amplification. ACS Sens. 2021;6(10):3773-3780.

[12] Nemr CR, Smith SJ, Liu W, et al. Nanoparticle-Mediated Capture and Electrochemical Detection of Methicillin-Resistant Staphylococcus aureus. Anal Chem. 2019;91(4):2847-2853.
